# Supplementary material
Source: publisher site journal article supplement (https://www.dovepress.com/article/502865)
Supplement: Supplementary file 1 [file 502865%20Supplementary%20file.docx]

**Supplementary Figure 1 –** Flowchart of included participants


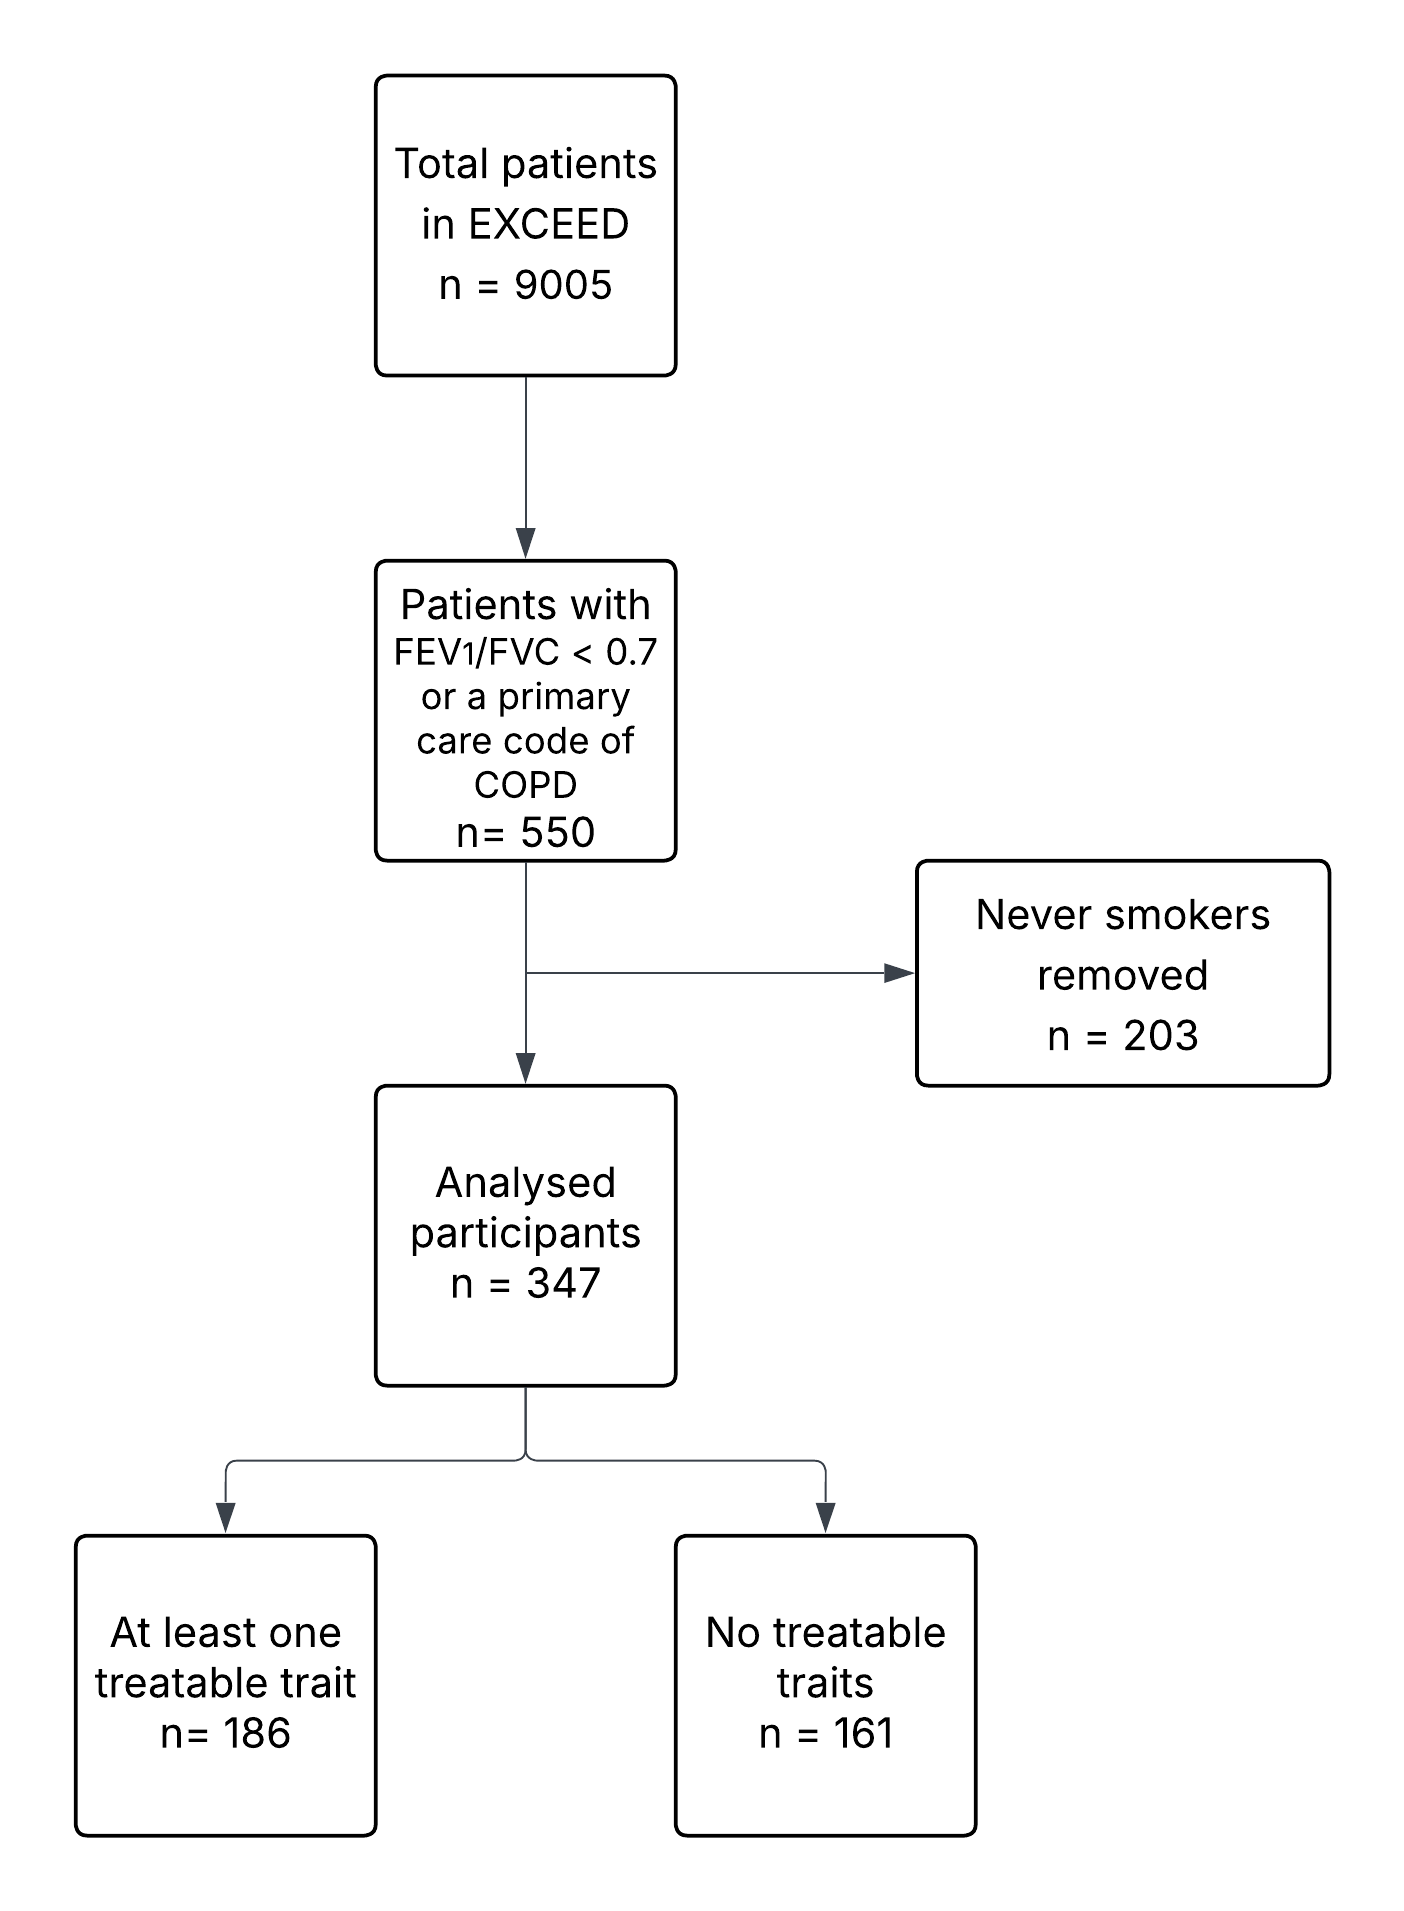


**Supplementary Figure 2 –** Upset plotof trait frequency restricted to those with a primary care code of COPD. Each vertical bar represents a unique combination of traits shared among patients, with bar height corresponding to frequency. Individual trait frequencies are displayed as horizontal bars on the left, representing the total number of patients exhibiting each trait. Categories and intersections with fewer than 5 occurrences have been removed to ensure privacy.


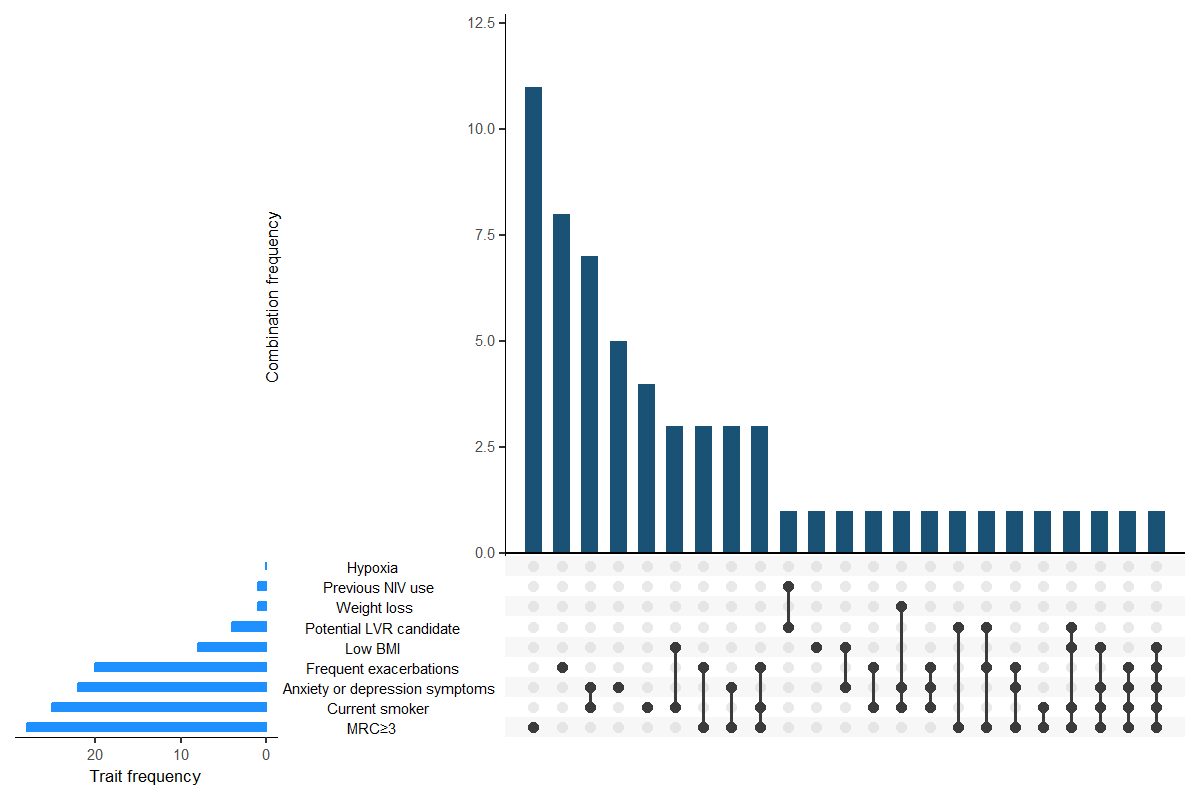


**List of extracted primary care codes**

**Supplementary Table 1 - Depression codes**

| Code | Term ID | Description |
| --- | --- | --- |
| 6891. | Yaef0 | Depression screening |
| E1121 | Y01FS | Single major depressive episode, mild |
| E1122 | Y01FT | Single major depressive episode, moderate |
| E1123 | Y01FU | Single major depressive episode, severe, without mention of psychosis |
| E1124 | Y01FV | Single major depressive episode, severe, with psychosis |
| E112z | Y01FY | Single major depressive episode NOS |
| E1130 | Y01Fb | Recurrent major depressive episodes, unspecified |
| E1131 | Y01Fc | Recurrent major depressive episodes, mild |
| E1132 | Y01Fd | Recurrent major depressive episodes, moderate |
| E1133 | Y01Fe | Recurrent major depressive episodes, severe, without mention of psychosis |
| E1134 | Y01Ff | Recurrent major depressive episodes, severe, with psychosis |
| E1137 | YaYAt | Recurrent depression |
| E113z | Y01Fi | Recurrent major depressive episode NOS |
| E130. | Y01FI | Psychotic reactive depression |
| E2112 | YMBxo | Neurotic depression |
| E2B1. | YaYB5 | Chronic depression |
| X00S8 | Y01Cd | Post-schizophrenic depression |
| X00Sb | Y01Gs | Anxiety depression |
| X00SQ | Y01FK | Agitated depression |
| X00SR | Y01FO | Endogenous depression |
| X00SS | Y01Fj | Endogenous depression first episode |
| X761J | Y7D7m | Depression worse in morning |
| X761K | Y7D7n | Depression worse later in day |
| XaB9J | YMJar | Depression NOS |
| XaCHr | YMBxU | [X] Single episode agitated depression without psychotic symptoms |
| XaCHs | YMBxV | [X] Single episode major depression without psychotic symptoms |
| XaCIs | Yabyn | Mild depression |
| XaCIu | Yabyq | Severe depression |
| Xafff | Yaz1r | PHQ-15 (Patient Health Questionnaire 15) score |
| XagU1 | YazI5 | Recurrent reactive depressive episodes, severe, with psychosis |
| XagUK | YazIB | Prolonged single episode of reactive depression |
| XaImU | YalJv | Symptoms of depression |
| XaItx | Yale4 | Depression management programme |
| XaIwf | YaliE | HAD scale: depression score |
| XaK6e | YanJc | Depression medication review |
| XaKaX | Yantn | Depression anxiety stress scales depression score |
| XaKaY | Yantp | Depression anxiety stress scales stress score |
| XaKaZ | Yantr | Depression anxiety stress scales anxiety score |
| XaLDN | YaoHD | Patient health questionnaire (PHQ-9) score |
| XaLIc | YaoNB | Depression screening using questions |
| XaLLG | YaoQf | Beck depression inventory second edition score |
| XaPKm | Yas1A | On full dose long term treatment for depression |
| XaX0C | Yattn | Suspected depression |
| XaX1i | Yatuu | MADRS - Montgomery-Asberg depression rating scale |
| XaX53 | Yatxk | Single major depressive episode, severe, with psychosis, psychosis in remission |
| XaY4X | Yaue8 | Assessment using Whooley depression screen |
| XaYuW | YavAn | Depression intensity scale circles |
| XaYwr | YavNY | EQ-5D-5L (EuroQol five dimension five level) anxiety depression score |
| XaZJN | YavR7 | PHQ-2 - patient health questionnaire 2 |
| XE1Y0 | Y01FQ | Single major depressive episode |
| XE1YC | Y01FL | Reactive depression |
| XM0aq | YM9Rj | BDI - Beck depression inventory |
| XM0bH | YM9SO | Brief depression rating scale |
| XM0cP | YM9U9 | Depression anxiety scale |
| XM0cQ | YM9UA | Depression self rating scale |
| XM0df | YaVJ2 | Geriatric depression score |
| XM0e0 | YM9Wc | Hamilton rating scale for depression |
| XM0eK | YaRJr | HADS - Hospital anxiety and depression scale |
| XM0ew | YM9Y1 | Leeds scale for the self-assessment of anxiety and depression |
| XM0km | YM9gN | WHO depression scale |
| XM0kW | YM9fy | Wakefield self-assessment depression inventory |
| XM0kx | YM9gZ | Zung self-rating depression scale |
| XM1GC | Y01FZ | Endogenous depression - recurrent |
| XSEGJ | YSNUF | Major depression |
| XSGok | YSRJY | Mild major depression |
| XSGol | YSRJZ | Moderate major depression |
| XSGom | YSRJa | Severe major depression without psychotic features |
| XSGon | YSRJb | Severe major depression with psychotic features |
| ZV790 | Ya0qU | [V]Screening for depression |
| E112. |  | Depression: [single major episode] or [agitated] or [endogenous (including first episode)] |
| E1120 |  | Single major depressive episode, unspecified |
| E113. |  | Recurrent depression: [major episode] or [endogenous] |
| E11y2 |  | Atypical depressive disorder |
| E2B.. |  | Depressive disorder NEC |
| Eu320 |  | [X]Mild depressive episode |
| Eu321 |  | [X]Moderate depressive episode |
| Eu322 |  | [X] Severe depressive episode without psychotic symptoms: (& [single episode agitated depression] or [single episode major depression] or [single episode vital depression]) |
| Eu323 |  | [X] Severe depressive episode with psychotic symptoms: (& single episode of [major depression] or [psychogenic depressive psychosis] or [psychotic depression] or [reactive depressive psychosis]) |
| Eu32y |  | [X] Depression: [other episodes] or [atypical] or [single episode masked NOS] |
| Eu32z |  | [X] (Depression: [episode, unspecified] or [NOS (& reactive)] or [depressive disorder NOS] |
| Eu331 |  | [X]Recurrent depressive disorder, current episode moderate |
| Eu332 |  | [X]Depression without psychotic symptoms: [recurrent: [major] or [manic-depressive psychosis, depressed type] or [vital] or [current severe episode]] or [endogenous] |
| Eu333 |  | [X] Depression with psychotic symptoms: [recurrent: (current episode severe) or (manic-depressive, depressed type) or (severe major episodes) or (severe episodes)] or [endogenous] |
| Eu33z |  | [X] Depression recurrent: [unspecified] or [monopolar NOS] |
| X00SO |  | Depressive disorder |
| X00SU |  | Masked depression |
| Xa0wV |  | Recurrent brief depressive disorder |
| XaCIt |  | Moderate depression |
| XE1aY |  | Depression: [reactive (neurotic)] or [postnatal] |
| XE1Y1 |  | Recurrent major depressive episodes |
| XE1Za |  | [X]Other depressive episodes |
| XE1Zb |  | [X]Depressive episode, unspecified |
| XE1Zd |  | [X]Recurrent depressive disorder, current episode severe without psychotic symptoms |
| XE1Ze |  | [X]Recurrent depressive disorder, current episode severe with psychotic symptoms |
| XE1Zf |  | [X]Recurrent depressive disorder, unspecified |
| XE1ZY |  | [X]Severe depressive episode without psychotic symptoms |
| XE1ZZ |  | [X]Severe depressive episode with psychotic symptoms |
| XaK6f |  | Depression interim review |

**Supplementary Table 2 Anxiety codes**

| Code | Term ID | Description |
| --- | --- | --- |
| E200. | Y01Gq | Anxiety state |
| E2000 | Y01Gb | Anxiety state unspecified |
| E2002 | Y01Gl | Generalised anxiety disorder |
| E2004 | YaYAu | Chronic anxiety |
| E2005 | YaYAv | Recurrent anxiety |
| E200z | Y01Ga | Anxiety state NOS |
| Eu41. | YMB4X | [X]Other anxiety disorders |
| Eu410 | YMB4Y | [X]Panic disorder [episodic paroxysmal anxiety] |
| Eu413 | YMB4b | [X]Other mixed anxiety disorders |
| Eu41z | YMB4d | [X]Anxiety disorder, unspecified |
| Ua1qf | YMGWS | Terrified |
| Ua1qS | YMGBI | Panic attack |
| X00RP | Y017s | Organic anxiety disorder |
| X00Sa | Y01Gi | Non-situational panic attack |
| X00Sb | Y01Gs | Anxiety depression |
| X00Sc | Y01Gt | Anxiety hysteria |
| X00SZ | Y01Gh | Situational panic attack |
| X761b | Y7D8R | Fear of collapsing |
| X761g | Y7D8W | Fear of dying |
| X761N | Y7D7s | Anxiety and fear |
| X761P | Y7D8A | Ill-at-ease |
| X761T | Y7D8J | Anxiety about health |
| X762T | Y7D9Y | Fear of death |
| Xa0XQ | Ya1mD | Anxiety about dying |
| Xa3Vj | Ya5rp | Panic |
| Xa3Xk | Ya5up | Level of anxiety |
| Xa3Ys | Ya5wm | Character trait observations of level of anxiety |
| Xa3Yt | Ya5wn | Anxious character |
| Xa7kB | YaV9s | Anxiety attack |
| XaA5Z | YaYts | Beck anxiety inventory |
| Xaafv | YawVM | Anxiety about breathlessness |
| Xab9E | Yawxe | Anxiety screening |
| Xab9F | Yawxf | Anxiety screening using questions |
| Xab9G | Yawxg | Patient given advice about management of anxiety |
| Xaef0 | YayqD | Referral for psychological management of anxiety |
| XaIwe | YaliD | HAD scale: anxiety score |
| XaKaX | Yantn | Depression anxiety stress scales depression score |
| XaKaY | Yantp | Depression anxiety stress scales stress score |
| XaKaZ | Yantr | Depression anxiety stress scales anxiety score |
| XaNkT | Yaqjn | Generalised anxiety disorder 7 item score |
| XaYwr | YavNY | EQ-5D-5L (EuroQol five dimension five level) anxiety depression score |
| XaYwr | YavCf | EuroQol five dimension five level anxiety depression score |
| XaZe4 | Yavgi | Short health anxiety inventory |
| XaZJQ | YavR8 | Generalised anxiety disorder 2 scale |
| XaZJQ | YavR9 | GAD-2 (generalised anxiety disorder 2) scale |
| XE0rb | Ya5b6 | Anxiety |
| XE0ri | Y7D8h | Fear |
| XE1Y7 | Y01Gc | Panic disorder |
| XE1Y7 | Y01Gd | Episodic paroxysmal anxiety disorder |
| XE1Zj | YMB4c | [X]Other specified anxiety disorders |
| XM0ar | YM9Rk | Beck anxiety standardised rating scale |
| XM0bp | YM9TG | Clinical anxiety scale |
| XM0cP | YM9U9 | Depression anxiety scale |
| XM0eK | YM9X5 | Hospital anxiety and depression scale |
| XM0ew | YM9Y1 | Leeds scale for the self-assessment of anxiety and depression |
| XM0jC | YM9e9 | Speilberger state-trait anxiety inventory |
| XM0ky | YM9gc | ASI - Zung's anxiety status inventory |
| XM0kz | YM9gd | Zung's self-rating anxiety scale |
| Eu411 |  | [X]Generalized anxiety disorder |
| Eu054 |  | [X]Organic anxiety disorder |
| Eu41y |  | [X]Other specified anxiety disorders |
| Eu412 |  | [X]Mild anxiety depression |
| E2001 |  | Panic disorder |
| 1B1V. |  | C/O - panic attack |
| 1B13. |  | Anxiousness - symptom |
| E2003 |  | Anxiety with depression |
| Eu341 |  | [X]Persistant anxiety depression |

**Supplementary Table 3 - Breathlessness codes**

| Code | Term ID | Description |
| --- | --- | --- |
| XaIUi | Yakx7 | MRC Breathlessness Scale: grade 1 |
| XaIUl | YakxA | MRC Breathlessness Scale: grade 2 |
| XaIUm | YakxB | MRC Breathlessness Scale: grade 3 |
| XaIUn | YakxC | MRC Breathlessness Scale: grade 4 |
| XaIUo | YakxD | MRC Breathlessness Scale: grade 5 |

**Supplementary Table 4 - Oxygen saturation codes**

| Code | Term ID | Description |
| --- | --- | --- |
| X7708 | YMGFA | O2 -oxygen saturation |
| X7709 | Y7FXY | Arterial oxygen saturation |
| X770C | Y7FXe | Capillary oxygen saturation |
| X770D | Y7FXg | Oxygen saturation at periphery |
| Xabhv | YaxUQ | Baseline SpO2 (oxygen saturation at periphery) |
| Xaa6l | Yaw03 | Peripheral blood oxygen saturation on supplemental oxygen at rest |
| Xaa6j | Yaw01 | Peripheral blood oxygen saturation on room air at rest |
| XSKud | YSY9E | Oxygen saturation measurement |
| XaIai | Yal43 | Blood oxygen saturation (calculated) |
| Xa2ZQ | Ya4YC | Invasive oxygen saturation monitoring |
| Xaa6l | Yaw03 | Peripheral blood oxygen saturation on supplemental oxygen at rest |
| 44Y41 | YaXZE | Blood oxygen level abnormal |
| XSKud | YSY9E | Oxygen saturation measurement |

**Supplementary Table 5 - Use of home oxygen codes**

| Code | Term ID | Description |
| --- | --- | --- |
| 8771. | Y75QR | Oxygen therapy |
| cc... | y00D7 | Oxygen gas |
| pc... | y04wL | Oxygen equipment |
| pc1.. | y04wM | Oxygen set |
| pc11. | y04wO | BOC 33022 oxygen set |
| pc12. | y07EO | Medishield dom MDS240 oxygen set x1 |
| pc13. | y04wT | Oxylitre MR210 oxygen set x1 |
| pc14. | y07EP | Air app & valve D24 oxygen set x1 |
| pc15. | y04wR | Ohmeda Domic 2/4 1550033 oxygen set |
| pc16. | y04wX | Oxygen giving set |
| pc17. | y04wP | BOC Domiflow 888830 oxygen set |
| pc18. | y04wQ | Puritan Bennett 778435 oxygen set |
| pc19. | y08Y3 | Sabre Medical Oxydom oxygen set |
| pc1A. | y0D6v | Therapy Equipment Dialreg 5120 oxygen set |
| pc1B. | y0Dbl | Oxylitre M410 oxygen set |
| pc2.. | y04wY | Oxygen mask |
| pc25. | y04wc | Venticaire oxygen mask |
| pc26. | y0ELT | Venticaire 28% Venturi oxygen mask |
| pc3.. | y04we | Oxygen cylinder |
| pc32. | y09qF | Oxygen gas cylinder AD |
| pc34. | y09qH | Oxygen gas cylinder C |
| pc35. | y09qI | Oxygen gas cylinder D |
| pc36. | y09qJ | Oxygen gas cylinder E |
| pc38. | y09qL | Oxygen gas cylinder G |
| pc39. | y09qM | Oxygen gas cylinder J |
| pc3A. | y09qN | Oxygen gas cylinder PD |
| pc3B. | y09qO | Oxygen gas cylinder SD |
| pc3C. | y0EQI | Oxygen gas cylinder DD |
| pc3D. | y0EQJ | Oxygen gas cylinder HD |
| pc3E. | y0EQK | Oxygen gas cylinder RD |
| pc3F. | y0EQL | Oxygen gas cylinder DF |
| pc3G. | y0EQM | Oxygen gas cylinder HX |
| pc3H. | y0Gwu | Oxygen gas cylinder FC |
| pc4.. | y04wg | Oxygen concentrator |
| pc41. | y04wh | Oxygen concentrator 1 |
| pc5.. | y0C7E | Oxygen nasal cannula |
| x01Sl | y04wN | Oxygen regulator DT specification 01A |
| x01Sm | y04wU | Oxygen regulator DT specification 01B |
| x01Sn | y04wS | Oxylitre MR210 oxygen set |
| x028p | y04wW | Medishield Domiciliary MDS240 oxygen set |
| x028q | y04wV | Air Apparatus+Valve D24 oxygen set |
| X71a1 | YaRE5 | LTOT - Long-term oxygen therapy |
| X7742 | Y7Fjq | Oxygen concentration |
| X7743 | Y7Fjr | Respired oxygen concentration |
| X7744 | Y7Fjv | Oxygen concentration - inspired |
| X77PG | Y7GCE | Oxygen flux |
| X77PH | Y7GCG | Indexed oxygen delivery |
| XaA0s | YaYmG | Humidified oxygen therapy |
| Xaa6S | Yavzj | Number of hours oxygen therapy prescribed per day |
| Xaa6T | Yavzk | Supplier reported volume of supplemental oxygen prescribed per day |
| Xaa6U | Yavzl | Supplier reported volume of supplemental oxygen used per day |
| Xaa6V | Yavzm | Supplier reported volume variance between prescribed and used supplemental oxygen per day |
| Xaa8f | Yaw1x | Supplier reported percentage variance between prescribed and used supplemental oxygen per day |
| XaaNt | YawFZ | Requires oxygen therapy during exercise |
| XaaZl | YawQM | Number of hours long-term oxygen therapy prescribed per day |
| XaaZn | YawQO | Number of hours ambulatory oxygen therapy prescribed per day |
| XaaZo | YawQP | Supplier reported volume of long-term oxygen prescribed per day |
| XaaZr | YawQS | Supplier reported volume of ambulatory oxygen prescribed per day |
| XaFsb | Yah3a | High concentration oxygen therapy |
| XaLL8 | YaoQX | Ambulatory oxygen therapy |
| XaLL9 | YaoQY | Home oxygen supply - cylinder |
| XaLLA | YaoQZ | Home oxygen supply - concentrator |
| XaLLB | YaoQb | Home oxygen supply - liquid oxygen |
| XaLxV | Yap4Z | Patient consent given for supply of home oxygen |
| XaM30 | YapB7 | Oxygen therapy NOS |
| XaM31 | YapB8 | Other specified oxygen therapy |
| XaMGZ | YapRB | Home oxygen support |
| XaPy8 | YascF | Number of hours oxygen therapy required per day |
| XaQ11 | Yasf8 | Delivered oxygen flow rate |
| XaQ12 | Yasf9 | Delivered oxygen therapy percentage |
| XaWPM | Yatqm | HOOF (home oxygen order form) completed |
| XaZYY | YavbB | Patient on oxygen |
| XE1Sx | Y79zx | Oxygen at home |
| XM1Xh | Y79zw | Home oxygen supply started |

**Supplementary Table 6 - Use of non-invasive ventilation codes**

| Code | Term ID | Description |
| --- | --- | --- |
| X71a8 | Y75Qt | BIPAP - Biphasic pressure airway support |
| Xa0Bz | Y75Rq | Domiciliary ventilation |
| XaLz1 | Yap62 | Ventilatory support |
| Xa4fY | YaRhI | Non-invasive ventilation |
| Xa1mN | Ya3T2 | Externally applied positive and negative pressure ventilation |
| 872Z. | Yac8m | Mechanical respiratory assistance NOS |
| Xa3aa | Ya5z5 | Pressure controlled ventilation |
| XaXqa | YauYx | Non-invasive ventilation therapy review |

**Supplementary Table 7 - Respiratory failure codes**

| Code | Term ID | Description |
| --- | --- | --- |
| H590. | YMAjP | Acute respiratory failure |
| H591. | YMAjQ | Chronic respiratory failure |
| R2y1. | YM17T | [D]Respiratory failure |
| R2y1z | YM17W | [D]Respiratory failure NOS |
| X008F | Y00S9 | Sleep-related respiratory failure |
| X103y | Y10ES | Respiratory failure without hypercapnia |
| X1040 | Y10EY | Hypercapnic respiratory failure |
| XaO5l | YaqtU | Chronic type 1 respiratory failure |
| XaO5m | YaqtV | Chronic type 2 respiratory failure |
| XaZhn | Yavii | History of acute type I respiratory failure |
| XaZhq | Yavim | History of acute type II respiratory failure |
| XM09V | Y10EQ | Respiratory failure |

**Supplementary Table 8 - Respiratory referral codes**

| Code | Term ID | Description |
| --- | --- | --- |
| 8H4C. | Y79jd | Referred to chest physician |
| 9N1d. | Ya3pZ | Seen in asthma clinic |
| XaAcQ | YaZZq | Referral to chest medicine service |
| XaAcR | YaZZr | Referral to thoracic medicine service |
| XaAcS | YaZZs | Referral to respiratory medicine service |
| XaAfk | YaZdn | Referral to chest physician |
| XaAfl | YaZdo | Referral to thoracic physician |
| XaAfm | YaZdp | Referral to respiratory physician |
| XaASl | YaZMg | Seen by respiratory physician |
| XaAVY | YaZQD | Seen by respiratory medicine - service |
| XaIOU | Yakp3 | Referral to respiratory rapid response team |
| XaIoY | YalOg | Seen by rapid response team - respiratory |
| XaJeS | Yamir | Referral to respiratory nurse specialist |
| XaLr4 | YaoyT | Refer to community respiratory team |
| XaMjF | YapkW | Seen in community respiratory clinic |
| XaONr | YaqyL | Seen in respiratory clinic |
| XaRCE | Yatg9 | Referral to respiratory assistant practitioner |
| XaX21 | YatvB | Referral to respiratory outreach team |
| XaXyZ | Yaud8 | Seen by respiratory nurse specialist |
| XaYWS | Yauqx | Referral to respiratory clinic |
| XaZoz | Yavkr | Seen in chronic obstructive pulmonary disease clinic |

**Supplementary Table 9 - Eosinophil count codes**

| Code | Term ID | Description |
| --- | --- | --- |
| 42K.. | Y7FAh | Eosinophil count |
| 42KZ. | Y7FAj | Eosinophil count NOS |
| 42K1. | Y7FAi | Eosinophil count normal |
| 42K3. | Y7FAk | Eosinophil count raised |
| XaCJj | Yaeib | Percentage eosinophil count |

**Supplementary Table 10 - Pulmonary rehabilitation referral codes**

| Code | Term ID | Description |
| --- | --- | --- |
| XS7qP | YSCFO | Pulmonary rehabilitation |
| Ub1ni | Ya2KB | Pulmonary rehabilitation class |
| XaaNR | YawF7 | Pulmonary rehabilitation review |
| XabGM | Yax3X | Pulmonary rehabilitation offered |
| XaNQU | YaqRk | Pulmonary rehabilitation declined |
| XaIf9 | YalAF | Referral to pulmonary rehabilitation |
| XagBC | Yaz9u | Unsuitable for pulmonary rehabilitation |
| XaIUq | YakxF | Pulmonary rehabilitation programme commenced |
| XaIUs | YakxH | Pulmonary rehabilitation programme completed |
| XaPZH | YasIt | Chronic obstructive pulmonary disease patient unsuitable for pulmonary rehabilitation |

**Supplementary Table 11 Smoking cessation referral codes**

| Code | Term ID | Description |
| --- | --- | --- |
| 9OO1. | YacuF | Attends stop smoking monitoring |
| XaaDy | Yaw6E | Referral to smoking cessation service |
| Xaca0 | Yay94 | Varenicline smoking cessation therapy offered |
| XaIpo | YamDm | Did not attend smoking cessation clinic |
| XaItC | Yalcu | Referral to smoking cessation advisor |
| XaIth | Yaldf | Smoking cessation programme start date |
| XaIye | YaltA | Seen by smoking cessation advisor |
| XaLD4 | YaoGv | Smoking cessation advice provided by community pharmacist |
| XaLMR | YaoRb | Attends practice smoking cessation clinic |
| XaLMS | YaoRc | Attends smoking cessation clinic not at practice |
| XaMlI | YapmM | Smoking cessation drug therapy |
| XaMlJ | YapmF | Nicotine replacement therapy using nicotine patches |
| XaMlK | YapmG | Nicotine replacement therapy using nicotine gum |
| XaMlL | YapmH | Nicotine replacement therapy using nicotine inhalator |
| XaMlM | YapmI | Nicotine replacement therapy using nicotine lozenges |
| XaMlN | YapmJ | Other specified smoking cessation therapy |
| XaMt6 | YapvD | Smoking cessation therapy NOS |
| XaMwY | Yapyh | Smoking cessation therapy |
| XaQT5 | Yat2g | Referral to NHS stop smoking service |
| XaQU8 | Yat3n | Stop smoking face to face follow-up |
| XaW0h | YatoO | Practice based smoking cessation programme start date |
| XaX0O | Yattt | Consent given for follow-up evaluation after smoking cessation intervention |
| XaX5W | YatyN | Consent given for follow-up by smoking cessation team |
| XaXnG | YauW4 | Stop smoking service opportunity signposted |
| XaXR4 | YauFu | Referral for smoking cessation service offered |
| XM1Rv | Y7ARO | Stop smoking clinic admin. |

**Supplementary Table 12 - Weight loss codes**

| Code | Term ID | Description |
| --- | --- | --- |
| R032. | YM0yB | [D]Abnormal loss of weight |
| X76CA | Y7DRN | Weight loss |
| X76CD | Y7DRQ | Percentage weight loss |
| XaBmk | YabBE | Excessive weight loss |
| XaIxC | Yaliw | Weight loss from baseline weight |
| XaKwR | Yao3m | Complaining of weight loss |
| XaQgK | YatEJ | Unexplained weight loss |
| XaXTs | YauJ3 | Unintentional weight loss |
| XE0qb | Y7DR9 | Abnormal weight loss |

**Supplementary Table 13 – Hospitalisation codes**

| Code | Term ID | Description |
| --- | --- | --- |
| 8H12. | Y79hA | Admit to respiratory ITU |
| 8H2.. | Y79hF | Emergency hospital admission |
| 8H21. | YacEm | Admit medical emergency unspecified |
| 8H2P. | Y79hf | Emergency admission, asthma |
| 8H2Z. | Y79hg | Admit hospital emergency NOS |
| 8H3P. | Y79mY | Non-urgent respiratory admission |
| 8H3Z. | Y79md | Other hospital admission NOS |
| 8H7a. | YaXmu | Refer to hospital |
| 8HJ.. | Y79jp | Self-referral to hospital |
| 8HJZ. | Y79k9 | Self-referral to hospital NOS |
| 8HM.. | YacFt | Listed for admission to hospital |
| 8HM1. | Y79l7 | Listed for Gen Medicine admiss |
| 8HMB. | Y79lH | Listed for Chest Med admission |
| 8HMZ. | Y79lY | Listed for hosp admission NOS |
| 8HN0. | YadXC | Inpatient stay longer than 12 hours |
| 8HN1. | YadXD | Inpatient stay 1 day |
| 8HN2. | YadXE | Inpatient stay 2 days |
| 8HN3. | YadXF | Inpatient stay 3 days |
| 8HN4. | YadXG | Inpatient stay 4 days |
| 8HN5. | YadXH | Inpatient stay 5 days |
| 8HN6. | YadXJ | Inpatient stay 6 days |
| 8HN7. | YadXK | Inpatient stay 7 days |
| 8HN8. | YadXL | Inpatient stay 8 days |
| 8HN9. | YadXM | Inpatient stay 9 days |
| 8HNA. | YadXN | Inpatient stay 10 days |
| 8HNB. | YadXO | Inpatient stay 11 days |
| 8HNC. | YadXP | Inpatient stay 12 days |
| 8HND. | YadXQ | Inpatient stay 13 days |
| 8HNE. | YadXR | Inpatient stay 14 days |
| 8HNZ. | YadXS | Inpatient stay NOS |
| Xa1qK | Ya3Z1 | Hospital admission |
| XaABh | YaZ2Q | Inpatient care |
| XaAKz | YaZDS | Admission by doctor |
| XaAL0 | YaZDT | Admission by accident and emergency doctor |
| XaAL4 | YaZDZ | Admission by GP |
| XaAL5 | YaZDa | Admission by own GP |
| XaAL6 | YaZDb | Admission by GP partner |
| XaAL7 | YaZDc | Admission by assistant GP |
| XaAL8 | YaZDd | Admission by associate GP |
| XaAL9 | YaZDe | Admission by co-op GP |
| XaALA | YaZDf | Admission by deputising GP |
| XaALB | YaZDg | Admission by GP locum |
| XaALb | YaZEA | Admission by care of the elderly physician |
| XaALC | YaZDh | Admission by GP registrar |
| XaALc | YaZEC | Admission by chest physician |
| XaALd | YaZED | Admission by thoracic physician |
| XaALe | YaZEE | Admission by respiratory physician |
| XaALm | YaZEM | Admission by general physician |
| XaALY | YaZE7 | Admission by physician |
| XaAMf | YaZFO | Admission by nurse |
| XaAMg | YaZFP | Admission by agency nurse |
| XaAMh | YaZFQ | Admission by enrolled nurse |
| XaAMi | YaZFR | Admission by general nurse |
| XaAMm | YaZFV | Admission by nurse practitioner |
| XaAMv | YaZFe | Admission to tertiary referral hospital |
| XaAMw | YaZFg | Admission to ward |
| XaAN3 | YaZFq | Admission to department |
| XaAN6 | YaZFw | Admit to ITU |
| XaAN7 | YaZFx | Admission to adult intensive care unit |
| XaAN9 | YaZG1 | Admission to medical department |
| XaAND | YaZG5 | Admission to chest medicine department |
| XaANE | YaZG6 | Admission to thoracic medicine department |
| XaANF | YaZG7 | Admission to respiratory medicine department |
| XaANN | YaZGF | Admission to general medical department |
| XaarU | Yawfd | Admission notification |
| XaBV3 | YaaoA | Inpatient stay |
| XaCHY | YabxA | Referral to hospital |
| Xafex | Yaz1X | Number of hospital admissions due to COPD (chronic obstructive pulmonary disease) in past year |
| XaIgX | YalBd | Hospital admission note |
| XaJFu | YamED | Admit COPD emergency |
| XaJID | YamGX | Admit respiratory emergency |
| XaK8S | YanLc | Emergency chronic obstructive pulmonary disease admission since last appointment |
| XaKzy | Yao5h | Multiple chronic obstructive pulmonary disease emergency hospital admissions |
| XaYgC | Yauz4 | Hospital re-admission |
| XaYYP | Yausc | Admission by out of hours service doctor |
| XaZ6X | YavKF | Admission profile form completed |
| XaZJX | YavRE | Admission to acute assessment unit |
| XaZVU | YavZ3 | Emergency hospital admission from walk-in centre |
